# Supplementary material for: Is meconium useful to predict fetal exposure to organochlorines and hydroxylated PCBs?
Source: Royal Society of Chemistry journal article supplement (doi:10.1039/c3em00132f), 2013-01-01
Supplement: c3em00132f.pdf [file c3em00132f.pdf]

## Electronic Supplementary Information

### Note S1. Organochlorine compounds not quantified

The following organochlorine compounds were difficult to detect. All compounds listed below had detection frequencies <50% (actual value is given in parentheses).

**Meconium:** *cis*-Chlordane (43%); Mirex (32%);  $\beta$ -HCH (40%); PCP (36%); 4'-OH-PCB 130 (3%); 3'-OH-PCB 138 (23%); PCBs 28 (45%), 101 (24%), 105 (19%), 123 (8%), 128 (0%), 141 (0%), 156 (16%), 157 (5%), 167 (0%), 170 (15%), 180 (24%), 183 (4%), 187 (4%), 189 (0%), 194 (0%). *o,p'*-DDT; *o,p'*-DDE; *p,p'*-DDD; *o,p'*-DDD were analysed but not possible to quantify.

**Maternal serum:** 4'-OH-PCB 130 (0%), 3'-OH-PCB 138 (12%).

### Note S2. List of compounds used as internal standards

The following  $^{13}\text{C}$ -labeled PCBs, chlorinated pesticides and phenolic compounds were used as internal standards: PCB 28, 52, 101, 105, 114, 118, 123, 138, 153, 156, 157, 167 and 180, dichlorodiphenyltrichloroethane (*p,p'*-DDT), dichlorodiphenyldichloroethylene (*p,p'*-DDE),  $\alpha$ -hexachlorocyclohexane ( $\alpha$ -HCH),  $\beta$ -hexachlorocyclohexane ( $\beta$ -HCH),  $\gamma$ -hexachlorocyclohexane ( $\gamma$ -HCH), hexachlorobenzene (HCB), *cis*-Nonachlor (*cis*-NC), *trans*-Nonachlor (*trans*-NC), *cis*-Chlordane (*cis*-CD), *trans*-Chlordane (*trans*-CD), *oxy*-Chlordane (*oxy*-CD), Mirex, 4-hydroxy-2,2',3,4',5,5',6-heptachlorobiphenyl (4-OH-CB 187), 4-hydroxy-2,3,3',4',5-pentachloro-biphenyl (4-OH-CB 107), 4-hydroxy-2,2',3,4',5,5'-hexachlorobiphenyl (4-OH-CB 146), and pentachlorophenol (PCP).
